# Supplementary material for: Changes in the Lifestyle of the Spanish University Population during Confinement for COVID-19
Source: MDPI journal article supplement (doi:10.3390/ijerph19042210), 2022-02-15
Supplement: s1 [file s1]

**Table S1.** Sociodemographic characteristics University Population.

| Total N=168 (100%)                    |                                              |             |
|---------------------------------------|----------------------------------------------|-------------|
| Gender                                | Women                                        | 112 (66.7%) |
|                                       | Men                                          | 56 (33.3%)  |
| Birthplace                            | Spain                                        | 133 (79.2%) |
|                                       | Latin America                                | 28 (16.7%)  |
|                                       | Europe                                       | 4 (2.4%)    |
|                                       | Others                                       | 3 (1.8%)    |
| Role                                  | Students                                     | 12 (76.8%)  |
|                                       | R.P <sup>1</sup>                             | 25 (14.9%)  |
|                                       | A.S <sup>2</sup>                             | 14(8.3%)    |
| Place of Residence                    | Family home                                  | 128 (76.2%) |
|                                       | Shared flat                                  | 19 (11.3%)  |
|                                       | Student residence                            | 10 (6%)     |
|                                       | Alone                                        | 11 (6.5%)   |
| BMI (kg/m <sup>2</sup> ) <sup>3</sup> | Underweight (<18.5kg/m <sup>2</sup> )        | 12 (7.1%)   |
|                                       | Normal weight (18.5-24.9kg/m <sup>2</sup> )  | 111 (66.1%) |
|                                       | Pre-obesity (25-29.9kg/m <sup>2</sup> )      | 36 (21.4%)  |
|                                       | Obesity class I (30-34.9kg/m <sup>2</sup> )  | 8 (4.8%)    |
|                                       | Obesity class II (35-39.9kg/m <sup>2</sup> ) | 1 (0.6%)    |

<sup>1</sup>R.P: Research Professors. <sup>2</sup>A.S: Administrative Staff. <sup>3</sup>BMI: Body Max Index, expressed in kg/m<sup>2</sup>, using WHO classification.

**Table S2.** Distribution of students for studies and faculties.

| Total N=129 (100%) |                                        |            |
|--------------------|----------------------------------------|------------|
| Faculty            | Health sciences                        | 85 (65.9%) |
|                    | Social and humanity sciences           | 35 (27.1%) |
|                    | Higher polytechnic school              | 9 (7%)     |
| Degree Program     | Phycology                              | 34 (26.4%) |
|                    | Human Nutrition and Dietetics          | 25 (19.4%) |
|                    | Sport and exercise sciences            | 12 (9.3%)  |
|                    | Food Sciences and Technology           | 10 (7.8%)  |
|                    | Translation and interpretation         | 9 (7%)     |
|                    | Advertising and Public relations       | 8 (6.2%)   |
|                    | Business Administration and Management | 7 (5.4%)   |
|                    | Industrial Organisation Engineering    | 5 (3.9%)   |
|                    | Journalism                             | 5 (3.9%)   |
|                    | Audiovisual Communication              | 4 (3.1%)   |
|                    | Agro-Food Engineering                  | 4 (3.1%)   |
|                    | Master General Health Psychology       | 4 (3.1%)   |
|                    | Applied Languages                      | 2 (1.6%)   |

**Table S3.** Dietary and lifestyle adaptations during the confinement, compared by Students vs. UE.

|                                                            | Total N =168<br>(100%; CI) | Students N=<br>129 (76.8%;<br>CI) | UE <sup>1</sup><br>N=39 (23.2%;<br>CI) | p-Value <sup>2</sup> |
|------------------------------------------------------------|----------------------------|-----------------------------------|----------------------------------------|----------------------|
| How many times do you do the grocery shopping per week?    |                            |                                   |                                        |                      |
| 1 or less per week                                         | 129 (76.8%;<br>69.6-82.9)  | 98 (76%;<br>67.6-83.0)            | 31 (79.5%; 63.5-<br>90.7)              | 0.648                |
| 2 or more per week                                         | 39 (23.2%; 17.0-<br>30.3)  | 31 (24%;<br>16.9-32.3)            | 8 (20.5%; 9.2-<br>36.4)                |                      |
| During the confinement, the consumption of fruits?         |                            |                                   |                                        |                      |
| Has increased                                              | 72 (42.9%; 35.2-<br>50.7)  | 59 (45.7%;<br>36.9-54.7)          | 13 (33.3%; 19.0-<br>50.2)              | 0.250                |
| Has decreased                                              | 20 (11.9%; 7.4-<br>17.7)   | 13 (10.1%;<br>5.4-16.6)           | 7 (17.9%; 7.5-<br>33.5)                |                      |
| Has stay the same                                          | 76 (45.2%; 37.5-<br>53.0)  | 57 (44.2%;<br>35.4-53.1)          | 19 (48.7%; 32.4-<br>65.2)              |                      |
| During the confinement, the consumption of vegetables?     |                            |                                   |                                        |                      |
| Has increased                                              | 69 (41.1%; 33.5-<br>48.9)  | 59 (45.7%;<br>36.9-54.7)          | 10 (25.6%; 13.0-<br>42.1)              | 0.062                |
| Has decreased                                              | 14 (8.3%; 4.6-<br>13.5)    | 11 (8.5%; 4.3-<br>14.7)           | 3 (7.7%; 1.6-<br>20.8)                 |                      |
| Has stay the same                                          | 85 (50.6%; 42.7-<br>58.3)  | 59 (45.7%;<br>36.9-54.7)          | 26 (66.7%; 49.7-<br>80.9)              |                      |
| During the confinement, the consumption of dairy products? |                            |                                   |                                        |                      |
| Has increased                                              | 43 (25.6%; 19.1-<br>32.8)  | 35 (27.1%;<br>19.6-35.6)          | 8 (20.5%; 9.2-<br>36.4)                | <0.05                |
| Has decreased                                              | 21 (12.5%; 7.9-<br>18.4)   | 20 (15.5%;<br>9.7-22.9)           | 1 (2.6%; 0.0-<br>13.4)                 |                      |
| Has stay the same                                          | 104 (61.9%;<br>54.1-69.2)  | 74 (57.4%;<br>48.3-66.0)          | 30 (76.9%; 60.6-<br>88.8)              |                      |
| During the confinement, the consumption of pulses?         |                            |                                   |                                        |                      |
| Has increased                                              | 45 (26.8%; 20.2-<br>34.1)  | 37 (28.7%;<br>21.0-37.3)          | 8 (20.5%; 9.2-<br>36.4)                | 0.354                |
| Has decreased                                              | 14 (8.3%; 4.6-<br>13.5)    | 12 (9.3%; 4.9-<br>15.6)           | 2 (5.1%; 0.6-<br>17.3)                 |                      |
| Has stay the same                                          | 109 (64.9%;<br>57.1-72.0)  | 80 (62%;<br>53.0-70.4)            | 29 (74.4%; 57.8-<br>86.9)              |                      |
| During the confinement, the consumption of fish/seafood?   |                            |                                   |                                        |                      |
| Has increased                                              | 39 (23.2%; 17.0-<br>30.4)  | 33 (25.6%;<br>18.3-34.0)          | 6 (15.4%; 5.8-<br>30.5)                | 0.166                |
| Has decreased                                              | 32 (19%; 13.4-<br>25.8)    | 21 (16.3%;<br>10.3-23.8)          | 11 (28.2%; 15.0-<br>44.8)              |                      |
| Has stay the same                                          | 97 (57.7%; 49.8-<br>65.3)  | 75 (58.1%;<br>49.1-66.7)          | 22 (56.4%; 39.6-<br>72.1)              |                      |
| During the confinement, the consumption of white meat?     |                            |                                   |                                        |                      |
| Has increased                                              | 28 (16.7%; 11.3-<br>23.1)  | 25 (19.4%;<br>12.9-27.2)          | 3 (7.7%; 1.6-<br>20.8)                 | 0.208                |
| Has decreased                                              | 10 (6%; 2.8-10.6)          | 8 (6.2%; 2.7-<br>11.8)            | 2 (5.1%; 0.6-<br>17.3)                 |                      |

|                                                                                |                        |                        |                       |        |
|--------------------------------------------------------------------------------|------------------------|------------------------|-----------------------|--------|
| Has stay the same                                                              | 130 (77.4%; 70.3-83.4) | 96 (74.4%; 65.9-81.6)  | 34 (87.2%; 72.5-95.7) |        |
| During the confinement, the consumption of red and processed meat?             |                        |                        |                       |        |
| Has increased                                                                  | 15 (8.9%; 5.0-14.2)    | 13 (10.1%; 5.4-16.6)   | 2 (5.1%; 0.6-17.3)    |        |
| Has decreased                                                                  | 33 (19.6%; 13.9-26.4)  | 28 (21.7%; 14.9-29.8)  | 5 (12.8%; 4.2-27.4)   | 0.243  |
| Has stay the same                                                              | 120 (71.4%; 63.9-78.1) | 88 (68.2%; 59.4-76.1)  | 32 (82.1%; 66.4-92.4) |        |
| During the confinement, the consumption of pastries and snacks?                |                        |                        |                       |        |
| Has increased                                                                  | 36 (21.4%; 15.4-28.4)  | 31 (24%; 16.9-32.3)    | 5 (12.8%; 4.2-27.4)   |        |
| Has decreased                                                                  | 51 (30.4%; 23.5-37.9)  | 45 (34.9%; 26.7-43.7)  | 6 (15.4%; 5.8-30.5)   | <0.01  |
| Has stay the same                                                              | 81 (48.2%; 40.4-56.0)  | 53 (41.1%; 32.5-50.0)  | 28 (71.8%; 55.1-84.9) |        |
| During the confinement, the consumption of rice/pasta/potatoes?                |                        |                        |                       |        |
| Has increased                                                                  | 36 (21.4%; 15.4-28.4)  | 31 (24%; 16.9-32.3)    | 5 (12.8%; 4.2-27.4)   |        |
| Has decreased                                                                  | 14 (8.3%; 4.6-13.5)    | 12 (9.3%; 4.9-15.6)    | 2 (5.1%; 0.6-17.3)    | 0.183  |
| Has stay the same                                                              | 118 (70.2%; 62.7-77.0) | 86 (66.7%; 57.8-74.7)  | 32 (82.1%; 66.4-92.4) |        |
| During the confinement, the consumption of nuts?                               |                        |                        |                       |        |
| Has increased                                                                  | 27 (16.1%; 10.8-22.5)  | 23 (17.8%; 11.6-25.5)  | 4 (10.3%; 2.8-24.2)   |        |
| Has decreased                                                                  | 36 (21.4%; 15.4-28.4)  | 30 (23.3%; 16.2-31.5)  | 6 (15.4%; 5.8-30.5)   | 0.215  |
| Has stay the same                                                              | 105 (62.5%; 54.7-69.8) | 76 (58.9%; 49.9-67.4)  | 29 (74.4%; 57.8-86.9) |        |
| During the confinement, the consumption of low alcohol drinks (wine and beer)? |                        |                        |                       |        |
| Has increased                                                                  | 18 (10.7%; 6.4-16.4)   | 9 (7%; 3.2-12.8)       | 9 (23%; 11.1-39.3)    |        |
| Has decreased                                                                  | 101 (60.1%; 52.2-67.5) | 87 (67.4%; 58.6-75.4)  | 14 (35.9%; 21.2-52.8) | <0.001 |
| Has stay the same                                                              | 49 (29.2%; 22.4-36.6)  | 33 (25.6%; 18.3-34.0)  | 16 (41%; 25.5-57.9)   |        |
| During the confinement, the consumption of spirits (vodka, gin, rum)?          |                        |                        |                       |        |
| Has increased                                                                  | 2 (1.2%; 0.1-4.2)      | 2 (1.6%; 0.1-5.4)      | 0 (0%)                |        |
| Has decreased                                                                  | 126 (75%; 67.7-81.3)   | 100 (77.5%; 69.3-84.3) | 26 (66.7%; 49.7-80.9) | 0.222  |
| Has stay the same                                                              | 40 (23.8%; 17.5-30.9)  | 27 (20.9%; 14.2-28.9)  | 13 (33.3%; 19.0-50.2) |        |
| During the confinement, the consumption of sugary drinks?                      |                        |                        |                       |        |

|                                                    |                        |                       |                       |       |
|----------------------------------------------------|------------------------|-----------------------|-----------------------|-------|
| Has increased                                      | 14 (8.3%; 4.6-13.5)    | 11 (8.5%; 4.3-14.7)   | 3 (7.7%; 1.6-20.8)    | 0.972 |
| Has decreased                                      | 96 (57.1%; 49.2-64.7)  | 74 (57.4%; 48.3-66.0) | 22 (56.4%; 39.6-72.1) |       |
| Has stay the same                                  | 58 (34.5%; 27.3-42.2)  | 44 (34.1%; 25.9-42.9) | 14 (35.9%; 21.2-52.8) |       |
| Do you cook more often during the confinement?     |                        |                       |                       |       |
| Yes                                                | 123 (73.2%; 65.8-79.7) | 92 (71.3%; 62.6-78.9) | 31 (79.5%; 63.5-90.7) | 0.313 |
| No                                                 | 45 (26.8%; 20.2-34.1)  | 37 (28.7%; 21.0-37.3) | 8 (20.5%; 9.2-36.4)   |       |
| Have you increased the number of meals these days? |                        |                       |                       |       |
| Has increased                                      | 43 (25.6%; 19.1-32.8)  | 31 (24%; 16.9-32.3)   | 12 (30.8%; 17.0-47.5) | 0.182 |
| Has decreased                                      | 45 (26.8%; 20.2-34.1)  | 39 (30.2%; 22.4-38.9) | 6 (15.4%; 5.8-30.5)   |       |
| Has stay the same                                  | 80 (47.6%; 39.8-55.4)  | 59 (45.7%; 36.9-54.7) | 21 (53.8%; 37.1-69.9) |       |
| During the confinement, your physical activity?    |                        |                       |                       |       |
| Has increased                                      | 61 (36.3%; 29.0-44.0)  | 52 (40.3%; 31.7-49.3) | 9 (23.1%; 11.1-39.3)  | <0.05 |
| Has decreased                                      | 83 (49.4%; 41.6-57.2)  | 57 (44.2%; 35.4-53.1) | 26 (66.7%; 49.7-80.9) |       |
| Has stay the same                                  | 24 (14.3%; 9.3-20.5)   | 20 (15.5%; 9.7-22.9)  | 4 (10.3%; 2.8-24.2)   |       |

<sup>1</sup> UE: University Employees. <sup>2</sup> Differences between role were evaluated by the Pearson Chi square test ( $p < 0.05$ ).
